# Supplementary material for: Exploration of the Canyon-Incised Continental Margin of the Northeastern United States Reveals Dynamic Habitats and Diverse Communities
Source: PubMed Central journal article supplement (PMC4624883; doi:10.1371/journal.pone.0139904), 2015-10-28

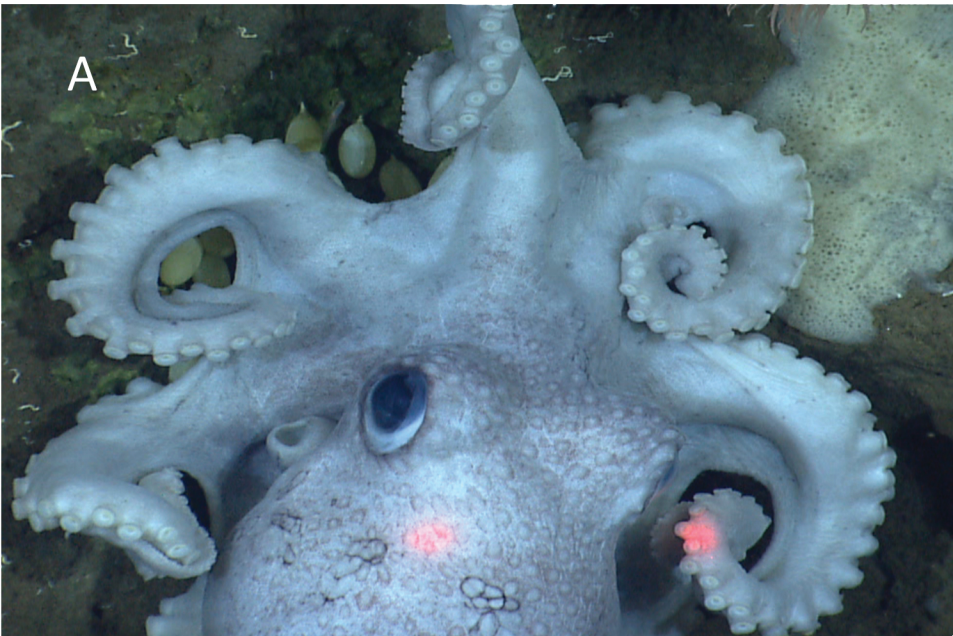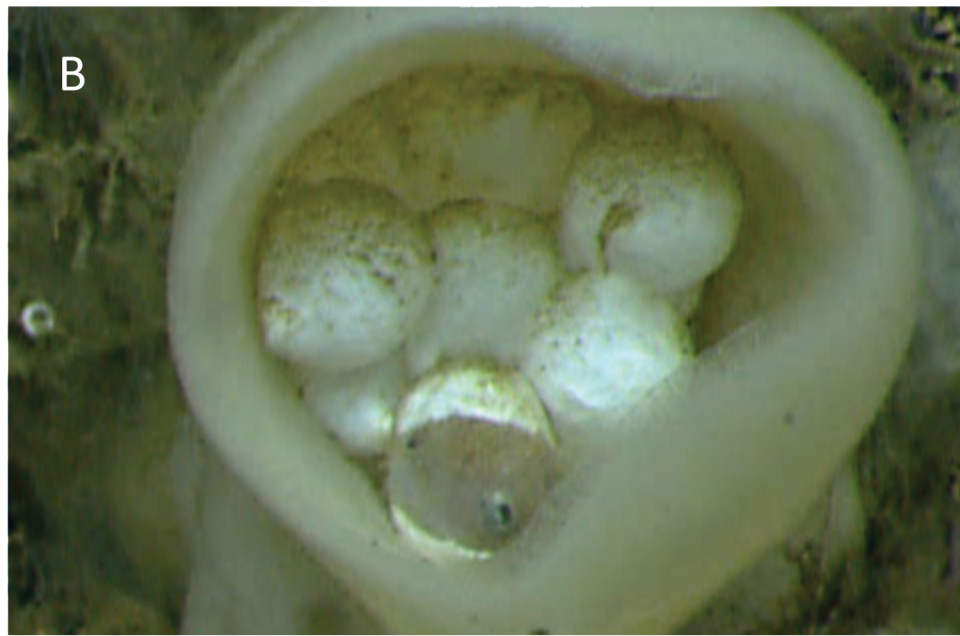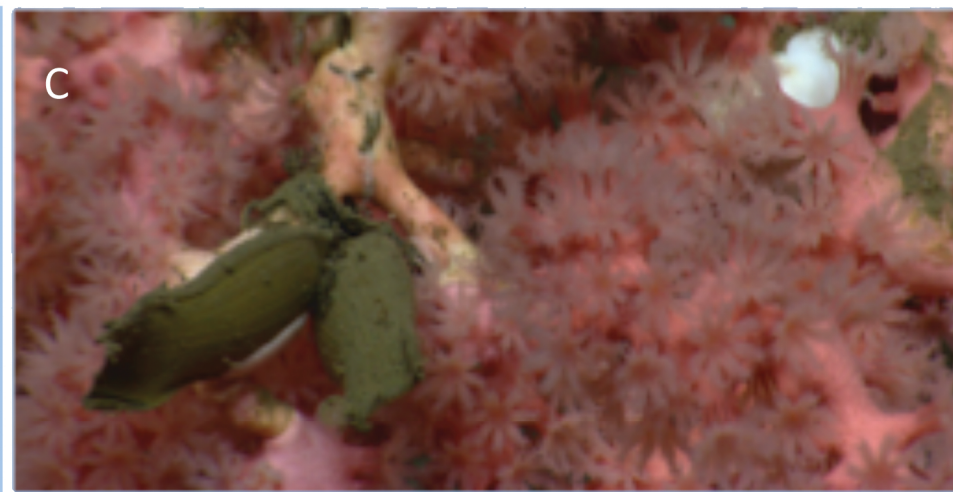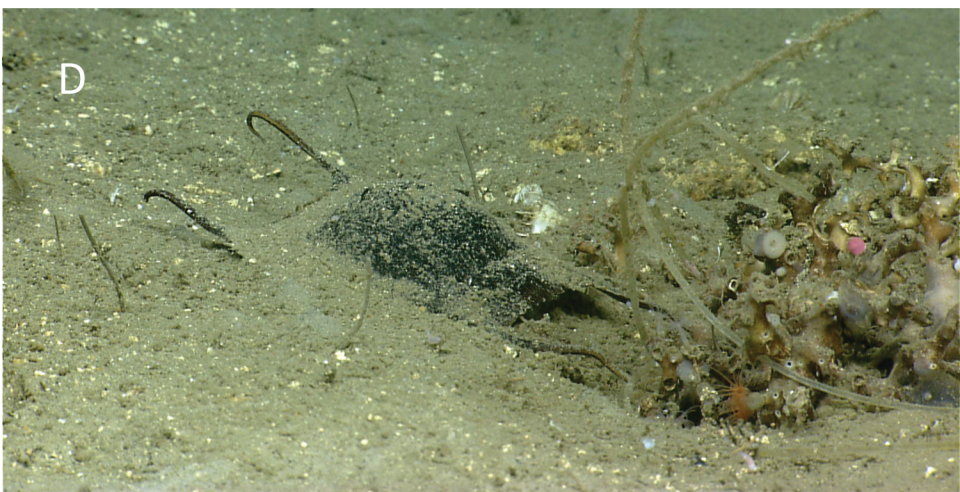

Supplement: pone.0139904.s002.pdf [file pone.0139904.s002.pdf]
